# Supplementary material
Source: Research Square preprint supplement (doi:10.21203/rs.3.rs-9635148/v1)
Supplement: Supplementary file 2 [file 7637a2a7044eb6df88303538.pdf]

CONSERVE Checklists

| CONSERVE-CONSORT Extension: May 6, 2026 |                              |                                                                                                                                                                                                                                                               |                |                              |                 |
|-----------------------------------------|------------------------------|---------------------------------------------------------------------------------------------------------------------------------------------------------------------------------------------------------------------------------------------------------------|----------------|------------------------------|-----------------|
| Item                                    | Item Title                   | Description                                                                                                                                                                                                                                                   |                |                              | Page No.        |
| I.                                      | Extenuating Circumstances    | Describe the circumstances and how they constitute extenuating circumstances.                                                                                                                                                                                 |                |                              | 9-10            |
| II.                                     | Important Modifications      | a. Describe how the modifications are important modifications.                                                                                                                                                                                                |                |                              | (see below)     |
|                                         |                              | b. Describe the impacts and mitigating strategies, including their rationale and implications for the trial.                                                                                                                                                  |                |                              | (see below)     |
|                                         |                              | c. Provide a modification timeline.                                                                                                                                                                                                                           |                |                              | 10              |
| III.                                    | Responsible Parties          | State who planned, reviewed and approved the modifications.                                                                                                                                                                                                   |                |                              | 8               |
| IV.                                     | Interim data                 | If modifications were informed by trial data, describe how the interim data were used, including whether they were examined by study group, and whether the individuals reviewing the data were blinded to the treatment allocation.                          |                |                              | n/a             |
| <b>CONSORT Number and Item</b>          |                              | For each row, if important modifications occurred check "direct impact" and/or "mitigating strategy" and <b>describe the changes in the trial manuscript or supplement</b> . Check "no change" for items that are unaffected in the extenuating circumstance. |                |                              | <b>Page No.</b> |
|                                         |                              | <b>No Change</b>                                                                                                                                                                                                                                              | <b>Impact*</b> | <b>Mitigating Strategy**</b> |                 |
| 1                                       | Title and abstract           | X                                                                                                                                                                                                                                                             |                |                              |                 |
| 2                                       | Introduction                 | X                                                                                                                                                                                                                                                             |                |                              |                 |
| 3                                       | Methods: Trial Design        | X                                                                                                                                                                                                                                                             |                |                              |                 |
| 4                                       | Methods: Participants        |                                                                                                                                                                                                                                                               |                | X                            | 9               |
| 5                                       | Methods: Interventions       |                                                                                                                                                                                                                                                               |                | X                            | 10-11           |
| 6                                       | Methods: Outcomes            | X                                                                                                                                                                                                                                                             |                |                              |                 |
| 7                                       | Methods: Sample Size         |                                                                                                                                                                                                                                                               | X              |                              | 15              |
| 8-10                                    | Methods: Randomization       | X                                                                                                                                                                                                                                                             |                |                              |                 |
| 11                                      | Methods: Blinding            | X                                                                                                                                                                                                                                                             |                |                              |                 |
| 12                                      | Methods: Statistical methods |                                                                                                                                                                                                                                                               | X              |                              | 15              |

|    |                                  |   |   |   |          |
|----|----------------------------------|---|---|---|----------|
| 13 | Results: Participant flow        |   | X |   | 9-10, 18 |
| 14 | Results: Recruitment             |   |   | X | 10, 18   |
| 15 | Results: Baseline data           | X |   |   |          |
| 16 | Results: Numbers analysed        |   | X |   | 15       |
| 17 | Results: Outcomes and estimation | X |   |   |          |
| 18 | Results: Ancillary analyses      | X |   |   |          |
| 19 | Results: Harms                   | X |   |   |          |
| 20 | Discussion: Limitations          | X |   |   |          |
| 21 | Discussion: Generalisability     | X |   |   |          |
| 22 | Other information: Registration  | X |   |   |          |
| 23 | Other information: Protocol      | X |   |   |          |
| 24 | Other information: Funding       | X |   |   |          |

\*Aspects of the trial that are directly affected or changed by the extenuating circumstance and are not under the control of investigators, sponsor or funder.

\*\*Aspects of the trial that are modified by the study investigators, sponsor or funder to respond to the extenuating circumstance or manage the direct impacts on the trial.

The CONSERVE-CONSORT Checklist is licensed by the CONSERVE Group under the Creative Commons Attribution-NonCommercial-NoDerivs 4.0 International license.

**Source:** Orkin AM, Gill PJ, Ghersi D, et al. Guidelines for Reporting Trial Protocols and Completed Trials Modified Due to the COVID-19 Pandemic and Other Extenuating Circumstances: The CONSERVE 2021 Statement. *JAMA*. 2021;326(3):257–265. doi:10.1001/jama.2021.9941
