# Supplementary material
Source: Research Square preprint supplement (doi:10.21203/rs.3.rs-9635148/v1)
Supplement: Supplementary file 3 [file b6c773bf01be7333131af2d7.pdf]

### Good Reporting of A Mixed Methods Study (GRAMMS)

| <b>Guideline</b>                                                                            | <b>Section: page</b>                                                                                           |
|---------------------------------------------------------------------------------------------|----------------------------------------------------------------------------------------------------------------|
| Describe the justification for using a mixed methods approach to the research question      | Context: p8<br>Strengths and limitations: p23-24                                                               |
| Describe the design in terms of the purpose, priority and sequence of methods               | Study Design: p9                                                                                               |
| Describe each method in terms of sampling, data collection and analysis                     | Outcomes + Qualitative Data: p11-13<br>Data collection: p13-14<br>Sample size: p14-15<br>Data analysis: p15-16 |
| Describe where integration has occurred, how it has occurred and who has participated in it | Data analysis: p16                                                                                             |
| Describe any limitation of one method associated with the present of the other method       | Strengths and limitations: p31-32                                                                              |
| Describe any insights gained from mixing or integrating methods                             | Discussion: p28<br>Strengths and limitations: p31-32                                                           |

*O'Cathain A, Murphy E, Nicholl J. The quality of mixed methods studies in health services research. J Health Serv Res Policy. 2008;13(2):92-98.*
